# Supplementary material
Source: MDPI journal article supplement (https://www.mdpi.com/2072-4292/15/7/1813)
Supplement: s1 [file s1]

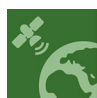

## Supplementary Materials

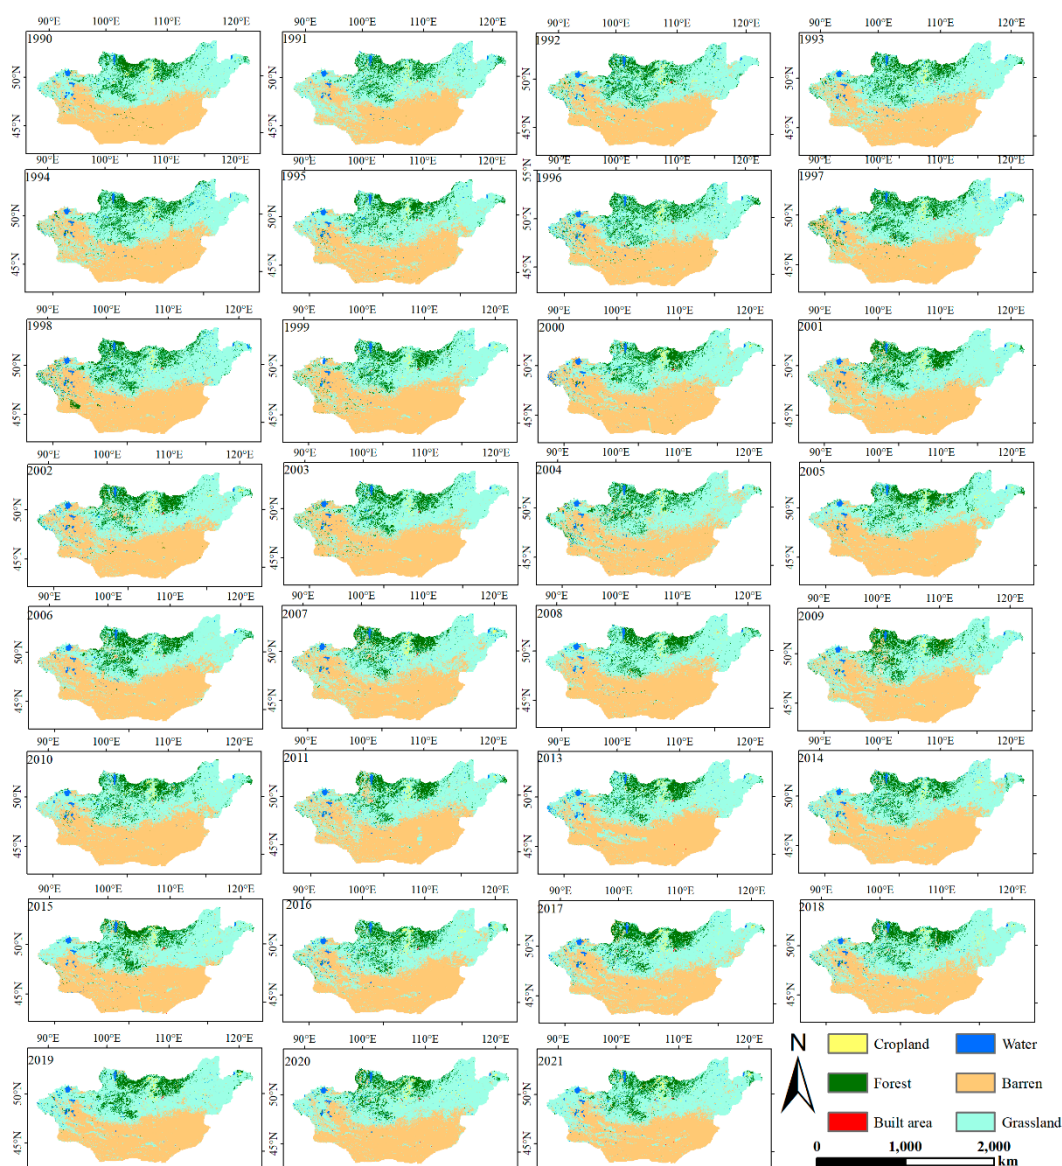

**Figure S1.** Spatial distribution of land use type in Mongolia from 1990 to 2021. The lack of land use type in 2012 is due to missing remote sensing images.

**Table S1.** Landsat5 and Landsat8 band parameters.

| Landsat5 |                              | Landsat8                         |
|----------|------------------------------|----------------------------------|
| B1       | Blue                         | (ultra-blue) surface reflectance |
| B2       | Green                        | Blue                             |
| B3       | Red                          | Green                            |
| B4       | Near infrared (NIR)          | Red                              |
| B5       | Short-wave infrared (SWIR_1) | near infrared (NIR)              |
| B6       | Brightness temperature       | Short-wave infrared (SWIR_1)     |
| B7       | Short-wave infrared (SWIR_2) | Short-wave infrared (SWIR_2)     |

**Table S2.** Reporting themes for accuracy results.

| Reporting themes | Description |
|------------------|-------------|
|------------------|-------------|

|                      |                                      |
|----------------------|--------------------------------------|
| Cropland gain        | To cropland from any other class     |
| Cropland loss        | From cropland to any other class     |
| Cropland—no change   | Cropland across 2015 and 2020 eras   |
| Forest gain          | To forest from any other class       |
| Forest loss          | From forest to any other class       |
| Forest—no change     | Forest across 2015 and 2020 eras     |
| Built area gain      | To built area from any other class   |
| Built area loss      | From built area to any other class   |
| Built area—no change | Built area across 2015 and 2020 eras |
| Water gain           | To water from any other class        |
| Water loss           | From water to any other class        |
| Water—no change      | Water across 2015 and 2020 eras      |
| Barren gain          | To barren from any other class       |
| Barren loss          | From barren to any other class       |
| Barren—no change     | Barren across 2015 and 2020 eras     |
| Grassland gain       | To grassland from any other class    |
| Grassland loss       | From grassland to any other class    |
| Grassland—no change  | Grassland across 2015 and 2020 eras  |

Table S3. Verification of classification accuracy.

| LUCC type  | Accuracy type | 1990   | 1991   | 1992   | 1993   | 1994   | 1995   | 1996   | 1997   | 1998   | 1999   | 2000   |
|------------|---------------|--------|--------|--------|--------|--------|--------|--------|--------|--------|--------|--------|
| Cropland   | PA (%)        | 74     | 61     | 63     | 58     | 59     | 62     | 59     | 60     | 64     | 56     | 63     |
|            | UA (%)        | 94     | 95     | 93     | 94     | 95     | 94     | 95     | 98     | 95     | 96     | 92     |
| Forest     | PA (%)        | 80     | 80     | 76     | 78     | 76     | 75     | 82     | 82     | 84     | 82     | 78     |
|            | UA (%)        | 88     | 94     | 84     | 89     | 85     | 83     | 87     | 88     | 86     | 94     | 89     |
| Built area | PA (%)        | 66     | 72     | 68     | 72     | 70     | 59     | 71     | 71     | 70     | 72     | 77     |
|            | UA (%)        | 100    | 98     | 99     | 98     | 98     | 100    | 98     | 98     | 98     | 98     | 95     |
| Water      | PA (%)        | 93     | 92     | 93     | 89     | 91     | 93     | 90     | 88     | 89     | 88     | 92     |
|            | UA (%)        | 98     | 94     | 96     | 95     | 97     | 97     | 96     | 93     | 95     | 99     | 96     |
| Barren     | PA (%)        | 88     | 83     | 85     | 81     | 89     | 83     | 85     | 83     | 86     | 88     | 87     |
|            | UA (%)        | 95     | 89     | 89     | 94     | 88     | 89     | 94     | 93     | 91     | 88     | 84     |
| Grassland  | PA (%)        | 91     | 91     | 89     | 92     | 86     | 88     | 90     | 90     | 88     | 90     | 83     |
|            | UA (%)        | 73     | 66     | 66     | 64     | 68     | 66     | 65     | 67     | 72     | 68     | 68     |
| OA (%)     | --            | 84.63  | 80.01  | 79.64  | 78.32  | 79.82  | 78.32  | 78.78  | 78.26  | 78.33  | 79.02  | 80.01  |
| Kappa      | --            | 0.7677 | 0.7492 | 0.7315 | 0.7117 | 0.7109 | 0.7127 | 0.7181 | 0.7112 | 0.7092 | 0.7220 | 0.7382 |

| LUCC type  | Accuracy type | 2001 | 2002 | 2003 | 2004 | 2005 | 2006 | 2007 | 2008 | 2009 | 2010 | 2011 |
|------------|---------------|------|------|------|------|------|------|------|------|------|------|------|
| Cropland   | PA (%)        | 64   | 63   | 63   | 64   | 59   | 59   | 64   | 61   | 63   | 64   | 59   |
|            | UA (%)        | 97   | 97   | 96   | 95   | 94   | 94   | 96   | 97   | 97   | 94   | 97   |
| Forest     | PA (%)        | 82   | 83   | 80   | 79   | 75   | 85   | 83   | 83   | 85   | 75   | 83   |
|            | UA (%)        | 91   | 92   | 91   | 89   | 84   | 86   | 92   | 91   | 88   | 85   | 89   |
| Built area | PA (%)        | 73   | 71   | 69   | 77   | 61   | 71   | 71   | 72   | 71   | 61   | 71   |
|            | UA (%)        | 98   | 98   | 100  | 96   | 100  | 97   | 98   | 100  | 98   | 100  | 98   |
| Water      | PA (%)        | 91   | 92   | 92   | 91   | 93   | 89   | 92   | 89   | 91   | 94   | 92   |
|            | UA (%)        | 96   | 93   | 98   | 95   | 97   | 96   | 94   | 95   | 97   | 95   | 95   |
| Barren     | PA (%)        | 89   | 88   | 89   | 88   | 89   | 91   | 87   | 86   | 85   | 89   | 86   |
|            | UA (%)        | 88   | 87   | 81   | 85   | 88   | 87   | 83   | 89   | 84   | 89   | 85   |
| Grassland  | PA (%)        | 90   | 88   | 92   | 88   | 87   | 87   | 87   | 88   | 85   | 87   | 85   |

|        |        |        |        |        |        |        |        |        |        |        |        |        |
|--------|--------|--------|--------|--------|--------|--------|--------|--------|--------|--------|--------|--------|
|        | UA (%) | 72     | 71     | 71     | 70     | 68     | 68     | 71     | 69     | 68     | 69     | 69     |
| OA (%) | --     | 80.21  | 82.18  | 83.30  | 81.21  | 79.94  | 76.07  | 80.16  | 79.92  | 79.12  | 80.63  | 79.79  |
| Kappa  | --     | 0.7331 | 0.7655 | 0.7795 | 0.7482 | 0.7349 | 0.7349 | 0.7011 | 0.7339 | 0.7246 | 0.7445 | 0.7337 |

| LUCC type  | Accuracy type | 2013   | 2014   | 2015   | 2016   | 2017   | 2018   | 2019   | 2020   | 2021   |
|------------|---------------|--------|--------|--------|--------|--------|--------|--------|--------|--------|
| Cropland   | PA (%)        | 61     | 61     | 59     | 62     | 70     | 66     | 68     | 74     | 70     |
|            | UA (%)        | 97     | 96     | 93     | 97     | 97     | 97     | 95     | 96     | 94     |
| Forest     | PA (%)        | 82     | 82     | 82     | 83     | 89     | 87     | 84     | 83     | 86     |
|            | UA (%)        | 88     | 90     | 90     | 90     | 92     | 82     | 86     | 93     | 85     |
| Built area | PA (%)        | 72     | 71     | 60     | 74     | 74     | 72     | 76     | 74     | 70     |
|            | UA (%)        | 99     | 100    | 100    | 100    | 98     | 98     | 98     | 98     | 98     |
| Water      | PA (%)        | 91     | 93     | 89     | 92     | 94     | 92     | 94     | 92     | 89     |
|            | UA (%)        | 95     | 95     | 94     | 99     | 98     | 98     | 98     | 97     | 99     |
| Barren     | PA (%)        | 90     | 88     | 85     | 87     | 85     | 84     | 88     | 86     | 83     |
|            | UA (%)        | 91     | 91     | 88     | 90     | 91     | 90     | 90     | 93     | 91     |
| Grassland  | PA (%)        | 88     | 90     | 87     | 90     | 91     | 91     | 90     | 94     | 87     |
|            | UA (%)        | 70     | 71     | 67     | 70     | 74     | 71     | 72     | 74     | 71     |
| OA (%)     | --            | 81.52  | 80.86  | 79.83  | 81.98  | 84.68  | 82.80  | 84.13  | 85.48  | 82.42  |
| Kappa      | --            | 0.7502 | 0.7467 | 0.7332 | 0.7621 | 0.7987 | 0.7731 | 0.7896 | 0.8090 | 0.7689 |

Table S4. UA and PA of LUCC.

|                      | UA (%) | PA (%) |
|----------------------|--------|--------|
| Cropland gain        | 57.88  | 62.09  |
| Cropland loss        | 42.31  | 62.65  |
| Cropland—no change   | 82.32  | 91.65  |
| Forest gain          | 84.05  | 82.72  |
| Forest loss          | 69.86  | 86.52  |
| Forest—no change     | 88.06  | 81.96  |
| Built area gain      | 71.03  | 77.97  |
| Built area loss      | 71.85  | 71.28  |
| Built area—no change | 83.09  | 88     |
| Water gain           | 40.07  | 40.13  |
| Water loss           | 43.26  | 41.16  |
| Water—no change      | 98.14  | 98.84  |
| Barren gain          | 77.25  | 85.36  |
| Barren loss          | 61.68  | 90.95  |
| Barren—no change     | 88.26  | 85.57  |
| Grassland gain       | 68.47  | 79.09  |
| Grassland loss       | 82.42  | 72.69  |
| Grassland—no change  | 88.98  | 81.09  |
